# Supplementary material for: Silver-loaded hollow copper sulfide particles for antibacterial therapy
Source: Royal Society of Chemistry journal article supplement (doi:10.1039/d5dt01646k), 2025-01-01
Supplement: d5dt01646k1.pdf [file d5dt01646k1.pdf]

## Supporting Information

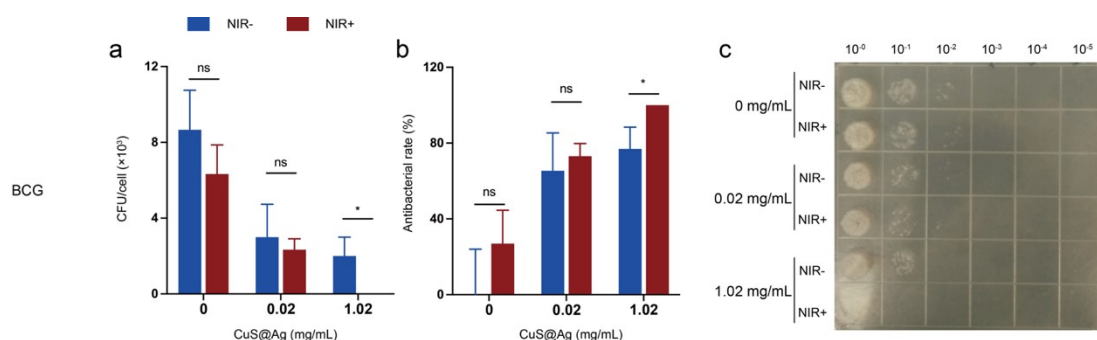

**Fig. S1.** Antibacterial activity of CuS against BCG. **(a)** Colony-forming units (CFU) per well after BCG was incubated with different concentrations of CuS. **(b)** Antibacterial rate per well after BCG was incubated with different concentrations of CuS. **(c)** Colony after BCG was incubated with different concentrations of CuS.

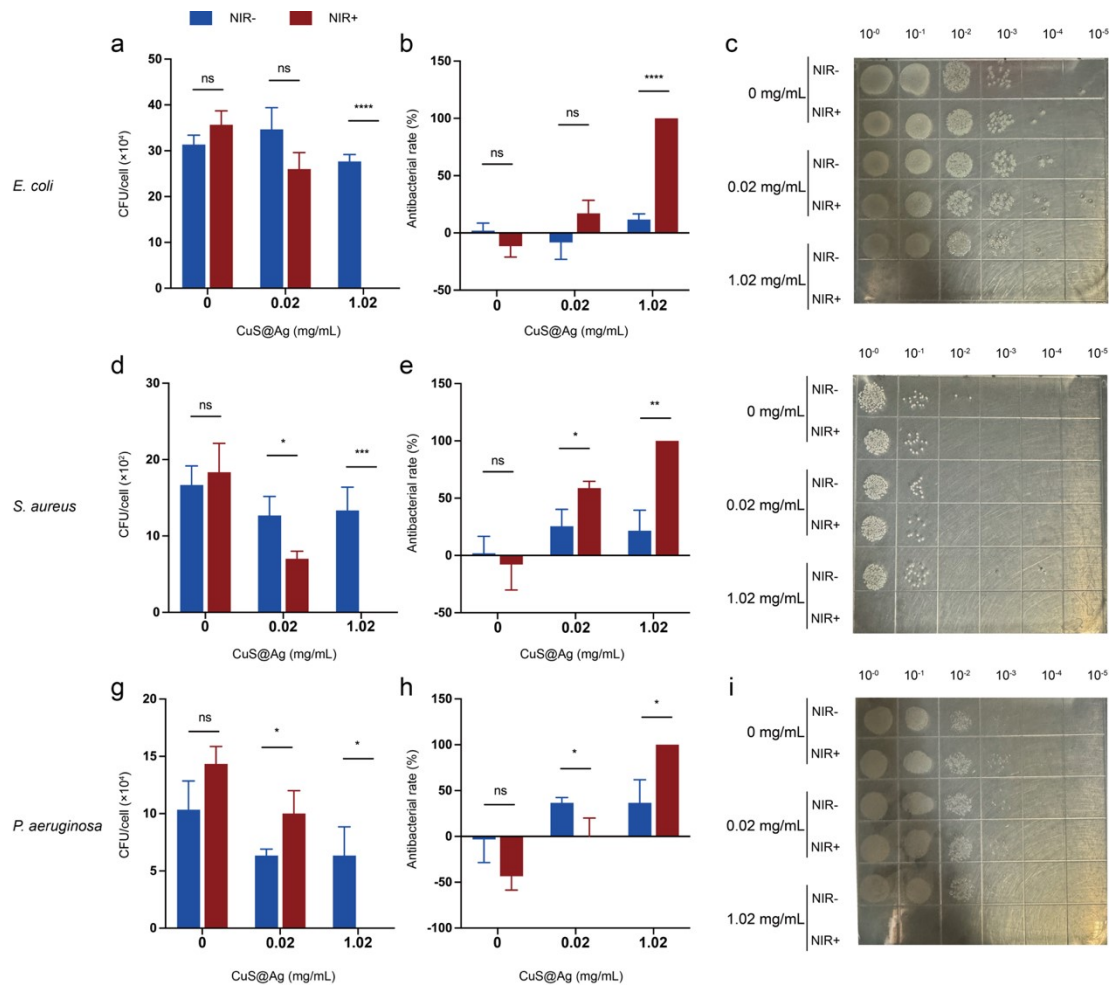

**Fig. S2.** Antibacterial effect of CuS against other pathogens. **(a)** Colony-forming units (CFU) per well after *E. coli* was incubated with different concentrations of CuS. **(b)** Antibacterial rate per well after *E. coli* was incubated with different concentrations of CuS. **(c)** Colony after *E. coli* was incubated with different concentrations of CuS. **(d)** CFU per well after *S. aureus* was incubated with different concentrations of CuS. **(e)** Antibacterial rate per well after *S. aureus* was incubated with different concentrations of CuS. **(f)** Colony after *S. aureus* was incubated with different concentrations of CuS. **(g)** CFU per well after *P. aeruginosa* were incubated with different concentrations of CuS. **(h)** Antibacterial rate per well after *P. aeruginosa* was incubated with different concentrations of CuS. **(i)** Colony after *P. aeruginosa* was incubated with different concentrations of CuS.
